1                    **Dynamic Kinetic Models Capture Cell-Free Metabolism for Improved**  
2                                            **Butanol Production**

3  
4  
5  
6  
7  
8                    Jacob P. Martin<sup>1,2,3</sup>, Blake J. Rasor<sup>1,2,3</sup>, Jonathon DeBonis<sup>1</sup>, Ashty S. Karim<sup>1,2,3</sup>,  
9                    Michael C. Jewett<sup>1,2,3</sup>, Keith E.J. Tyo<sup>1,2,3</sup>, Linda J. Broadbelt<sup>1,2\*</sup>

10  
11  
12  
13                    <sup>1</sup>Department of Chemical and Biological Engineering, Northwestern University,  
14                    Evanston, IL, USA 60208

15                    <sup>2</sup>Center for Synthetic Biology, Northwestern University, Evanston, IL, USA 60208

16                    <sup>3</sup>Chemistry of Life Processes Institute, Northwestern University, Evanston, IL, USA  
17                    60208

26 ABSTRACT

27 Cell-free systems are useful tools for prototyping metabolic pathways and  
28 optimizing the production of various bioproducts. Mechanistically-based kinetic models  
29 are uniquely suited to analyze dynamic experimental data collected from cell-free  
30 systems and provide vital qualitative insight. However, to date, dynamic kinetic models  
31 have not been applied with rigorous biological constraints or trained on adequate  
32 experimental data to the degree that they would give high confidence in predictions and  
33 broadly demonstrate the potential for widespread use of such kinetic models. In this  
34 work, we construct a large-scale dynamic model of cell-free metabolism with the goal of  
35 understanding and optimizing butanol production in a cell-free system. Using a novel  
36 combination of parameterization methods, the resultant model captures experimental  
37 metabolite measurements across two experimental conditions for nine metabolites at  
38 timepoints between 0 and 24 hours. We present analysis of the model predictions,  
39 provide recommendations for butanol optimization, and identify the aldehyde/alcohol  
40 dehydrogenase as the primary bottleneck in butanol production. Sensitivity analysis  
41 further reveals the extent to which various parameters are constrained, and our  
42 approach for probing valid parameter ranges can be applied to other modeling efforts.

43 KEY WORDS

44 Metabolic Modeling, Kinetic Modeling, Ensemble Modeling, ODE Models, Dynamic  
45 Models, Cell-Free Systems, Butanol Production, Parameter Optimization, Parameter  
46 Estimation, Metabolic Control Analysis, Systems Biology, Computational Biology

47

## 48 1. INTRODUCTION

49 Widespread commercial success of metabolic engineering projects – from the  
50 production of biofuels (Atsumi et al., 2008; Fackler et al., 2021; Liew et al., 2022) to  
51 pharmaceuticals (Galanie et al., 2015; Ro et al., 2006) to polymer precursors (Arvay et  
52 al., 2021; Chung et al., 2015) – remains a challenge due to sub-optimal titers and yields  
53 (Biggs et al., 2021) and difficulty in optimizing biosynthetic pathways for production  
54 (Naseri & Koffas, 2020). This challenge is due to several factors, including the  
55 competition in living cells between non-native biosynthesis and cell viability (Dudley et  
56 al., 2015; Rasor et al., 2021; Wu et al., 2016), the highly connected nature of metabolic  
57 networks which obscures simple design choices for optimization (Tsiantis & Banga,  
58 2020), and the difficulty of obtaining high-quality, kinetic data from living cells (Costa et  
59 al., 2016; Karim & Jewett, 2016). Cell-free systems addresses some of these issues, as  
60 cell viability no longer interferes with pathway flux, and time-course metabolomics are  
61 readily available without the need to extract intracellular species (Horvath et al., 2020;  
62 Karim et al., 2020; Miguez et al., 2019, 2021; Silverman et al., 2020; Vogeli et al., 2022).  
63 However, unlike purified systems, cell extract-based cell-free systems maintain much of  
64 the complexity of living metabolic networks (Bowie et al., 2020), which allows for native  
65 energy and cofactor regeneration to fuel biosynthesis (Jewett et al., 2008) but also  
66 preserves the complexity arising from network connectivity, making optimization  
67 nontrivial. While this complexity might seem problematic, it provides a means of  
68 collecting large data sets to understand and unravel metabolic complexity (Bowie et al.,  
69 2020; Bujara et al., 2011; Dudley et al., 2015, 2020).

70 Various computational models have been used to explain and analyze complex  
71 metabolic phenomena that would be difficult if not impossible to understand by manual  
72 inspection alone. For example, constraint-based models (CBMs), such as flux balance  
73 analysis (FBA)(Orth, Thiele, et al., 2010) and its many extensions (Jenior et al., 2020;

74 Lewis et al., 2010; Sánchez et al., 2017), have been used to simulate and explain  
75 cellular behaviors. However, CBMs can only simulate steady-state solutions with limited  
76 exceptions (Mahadevan et al., 2002), must assume cell-growth or other reasonable  
77 cellular objectives for optimization, and do not explicitly represent metabolites or enzyme  
78 abundances necessary to capture effects of enzyme saturation and allosteric regulation.

79 Kinetic models, which use a system of ordinary differential equations (ODEs)  
80 where metabolites are tracked through time by explicitly formulated reaction rates, can  
81 overcome these limitations (Strutz et al., 2019; Suthers et al., 2021). The primary  
82 challenge in creating kinetic models is finding parameter values for each reaction rate,  
83 as there are many more model parameters than experimental data points and  
84 parameters are often unobservable, making the calculation a single “correct” or “best”  
85 set of parameters impossible. To address this problem, an ensemble modeling (EM)  
86 approach can be applied to kinetic models, where several independently parameterized  
87 models, or parameter sets, are used simultaneously as an ensemble of models (Tran et  
88 al., 2008) to make predictions from the available data without overly relying on any  
89 single set of parameters.

90 Many kinetic modeling formalisms exist which highly depend on the type of  
91 system being modeled and the type and amount of data (Saa & Nielsen, 2017). For  
92 example, when modeling living-cell metabolism at steady-state, kinetic models have  
93 used “top-down” approaches for parameterization. First, known steady-state fluxes –  
94 either experimentally measured (Tran et al., 2008) or predicted from tools like flux  
95 balance analysis (J. Greene et al., 2019) – can be used as a “reference state” to lower  
96 the degrees of freedom of parameterization, though this tends to produce solutions  
97 which are more accurate nearer the reference state (J. L. Greene et al., 2017; St John et  
98 al., 2019). Second, steady-state models can forgo simulations of absolute metabolite  
99 concentrations in favor of tracking “relative” concentrations, again lowering the degrees

100 of freedom (Tran et al., 2008) (**Supplementary Methods S1**). Many methods are then  
101 available to estimate the remaining parameters in steady-state models, including Monte  
102 Carlo methods using random sampling (Tran et al., 2008), Bayesian estimation (Saa &  
103 Nielsen, 2016; St John et al., 2019), local optimization (Gopalakrishnan et al., 2020), and  
104 global parameter optimization (Khodayari et al., 2014).

105 In contrast, dynamic kinetic models, which can capture transient metabolism  
106 found in non-steady state systems, typically require a “bottom-up” approach in which  
107 model parameters are initially set at experimentally measured values if available (or at  
108 reasonable estimates) and later optimized (Kim et al., 2018). These models have been  
109 used for smaller-scale systems biology such as studying signaling or small isolated  
110 biosynthetic pathways, where there are fewer model parameters and the primary hurdle  
111 is network inference as opposed to parameter estimation (Min Lee et al., 2008). These  
112 pathway-level models have frequently chosen to not explicitly model cofactors (Jia et al.,  
113 2012; van Eunen et al., 2012), a choice which simplifies parameterization but limits the  
114 scope of utility. Conversely, some dynamic metabolic models have included significant  
115 portions metabolism but have “lumped” many reactions together into a single term or  
116 reduced model structure (Buffing et al., 2018; Kurata & Sugimoto, 2018). While these  
117 strategies make dynamic metabolic models more accessible, they limit the ability of the  
118 model to fit more complex metabolic interactions, such as those found in unpurified cell-  
119 free systems, and so more general methods were needed for this work. Recently, a  
120 large-scale, high-resolution, and fully dynamic kinetic model of metabolism in an  
121 *Escherichia coli*-derived cell-free system was developed using a literature-based  
122 ensemble with Markov Chain Monte Carlo parameter optimization to study metabolic  
123 impacts on cell-free protein synthesis (Horvath et al., 2020). While this work fit data from  
124 a single experiment, this effort nonetheless demonstrated the feasibility of large-scale,  
125 bottom-up parameterization of dynamic models in biological systems.

126 In this work, we aimed to develop a dynamic kinetic model of *E. coli*-based cell-  
127 free metabolism for the study of biosynthetic capacity that can capture complex cell-free  
128 metabolic behavior across multiple experimental conditions. To do this, we chose to  
129 model the heterologous butanol production pathway, comprising five enzymatic steps to  
130 catalyze the transformations from acetyl-CoA to butanol (Atsumi et al., 2008), which has  
131 been successfully implemented in extract-based cell-free systems (Karim et al., 2019,  
132 2020; Karim & Jewett, 2016). We chose this pathway in part because butanol is highly  
133 reduced and requires several cofactors, and so was expected to be highly connected  
134 with the larger cell-free metabolic network. Our model contains a large-scale  
135 representation of core *E. coli* metabolism and the heterologous butanol pathway, and  
136 model reactions are formulated with rate laws derived from mass-action kinetics of  
137 elementary enzyme mechanisms. To parameterize these models, we combined a Monte  
138 Carlo-based ensemble screening approach with a second step of local parameter  
139 optimization, which were used in series to successfully fit measurements of butanol and  
140 several species from various pathways of metabolism. Notably, both steps incorporated  
141 thermodynamic and literature constraints that have not previously been used in the  
142 bottom-up parameterization of large-scale dynamic models. The tools of metabolic  
143 control analysis (MCA) were then used to give insight into the driving factors of cell-free  
144 metabolism, as well as to give predictions regarding the optimization of butanol in this  
145 cell-free system. We anticipate our model along with the cell-free platform will facilitate  
146 both high-throughput prototyping of biosynthetic pathways for cellular design and cell-  
147 free biomanufacturing.

## 148 2. MATERIALS AND METHODS

### 149 2.1. CELL-FREE METABOLIC EXPERIMENTS AND DATA

150 Metabolically active cell extracts were prepared according to (Grubbe et al.,  
151 2020) from BL21-Star(DE3) *E. coli*. First, during cell-free protein synthesis (CFPS), each

152 enzyme in the butanol pathway was separately expressed in cell-free extracts and  
153 quantified via  $^{14}\text{C}$ -leucine incorporation (Rasor et al., 2022). Next, cell-free metabolic  
154 engineering (CFME) experiments were conducted as described in (Karim et al., 2020;  
155 Rasor et al., 2022), wherein each separately expressed butanol enzyme was added to  
156 fresh cell-free extract, along with 120 mM glucose and several other cofactors, salts, and  
157 other compounds. For the concentrations of each compound in the experiment present  
158 from CFPS or added at the beginning of the CFME experiment, see **Supplementary**  
159 **Table S7**.

160 Metabolite concentrations were measured by either high-performance liquid  
161 chromatography (flowing 5 mM sulfuric acid at 0.6 mL/min on an Aminex Rezex™  
162 ROA-Organic Acid H+ (8%) Column) or gas chromatography – mass spectrometry  
163 (using N,O-Bis(trimethylsilyl)trifluoroacetamide derivatization and an Agilent HP-5MS  
164 column with helium carrier gas). These measurements were taken every half hour from 0  
165 hours (defined when glucose is first added) through 7.5 hours and triplicate  
166 measurements were taken at 8 hours and 24 hours. Two experimental conditions were  
167 tested: a butanol-positive (production) condition where all enzymes in the butanol  
168 pathway were present, and a butanol-negative condition where the second enzyme in  
169 the butanol pathway, 3-hydroxybutyryl-CoA dehydrogenase (HBD), was not added, thus  
170 preventing butanol production. All metabolite measurements are given in  
171 **Supplementary Table S11**.

## 172 2.2. NETWORK CONSTRUCTION

173 The metabolic network used to represent cell-free *E. coli* metabolism was  
174 adapted from the model presented by Greene and coworkers (J. L. Greene et al., 2017),  
175 which itself contained all metabolites and reactions in the BiGG *E. coli* core model  
176 (Norsigian et al., 2020; Orth, Palsson, et al., 2010), as well as reactions described in a  
177 previous model of *E. coli* metabolism (Khodayari et al., 2014). To simulate the non-

178 steady state cell-free environment, our model removed any reactions allowing the  
179 transport of species between compartments as well as exchange reactions allowing  
180 species to enter or leave the system. Duplicate reactions from isozymes were also  
181 removed due to the lack of flux or literature data needed to distinguish each enzyme. All  
182 enzyme-inhibitor pairs described in recent kinetic models of *E. coli* metabolism were  
183 used (J. L. Greene et al., 2017; Horvath et al., 2020; Khodayari et al., 2014), as well as  
184 *E. coli* enzyme inhibition described in BRENDA (Chang et al., 2021) or MetaCyc (Caspi  
185 et al., 2014). All model regulation was either competitive or uncompetitive inhibition as  
186 reported in the literature, and noncompetitive inhibition and allosteric inhibition and  
187 activation were not considered due to lack of literature data. A full list of reactions and  
188 inhibition is given in **Supplementary Table S6**. Lastly, the reactions for the engineered  
189 pathway from acetyl-CoA to butanol (Atsumi et al., 2008) were included. The final model  
190 contained 63 enzymatic reactions, 63 metabolites, and 100 inhibitor-enzyme pairs, and  
191 is shown in **Figure 1**, as well as a more detailed representation in **Supplementary Fig.**  
192 **S1**.

193 To construct a kinetic model, an approximate rate law was derived and applied to  
194 each reaction. This equation to describe the rate of each enzymatic reaction expands  
195 the random-order ternary complex enzyme mechanism and rate law described in  
196 (Cornish-Bowden, 1979) with the additional assumption that the dissociation constant of  
197 each substrate in multi-substrate reactions is unaffected by binding order. This  
198 assumption halves the number of parameters per substrate compared to an order-  
199 dependent rate form (Cornish-Bowden, 1979). The resulting rate law is mechanistically  
200 grounded and is able to use experimental Michaelis constants as estimates for  
201 dissociation constants, yet does not require manual curation to specific enzyme  
202 mechanisms, is expandable to an arbitrary number of substrates, products, and



203 inhibitors, and reduces the hurdle of parameter estimation. In the case of two substrates  
204 and two products:

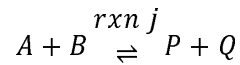

205 The resultant net rate equation for reaction  $j$  ( $v_{j,net}$ ), or the rates of the forward  
206 and reverse elementary steps ( $v_{j,f}$  and  $v_{j,r}$ ), is given below:

$$v_{j,net} = v_{j,f} - v_{j,r} = \frac{V_{max_{j,f}}[A][B] - V_{max_{j,r}}[P][Q]}{1 + \frac{[A]}{K_{d_{j,A}}} + \frac{[B]}{K_{d_{j,B}}} + \frac{[A][B]}{K_{d_{j,A}}K_{d_{j,B}}} + \frac{[P]}{K_{d_{j,P}}} + \frac{[Q]}{K_{d_{j,Q}}} + \frac{[P][Q]}{K_{d_{j,P}}K_{d_{j,Q}}}$$

207 The parameters  $V_{max_{j,f}}$  and  $V_{max_{j,r}}$  represent the forward and reverse maximal  
208 rates, or rate constants, and  $K_{d_{j,i}}$  represents the dissociation constant for species  $i$ . For  
209 details, see **Supplementary Methods S2**.

210 A few unique metabolites and reactions were implemented for this model. First,  
211 because the concentration of water is assumed to be constant, no dissociation constants  
212 for water are used in any rate law, and instead is implicitly included in the rate constant.  
213 Hydrogen ions are assumed to be buffered and are similarly not included in any rate  
214 laws. Gas exchange for carbon dioxide and oxygen between the aqueous and gas  
215 phases was included in the model, as CFME experiments were performed in a small  
216 volume of liquid with a large headspace. Preliminary partial differential equation (PDEs)  
217 modeling predicted spatial gradients of aqueous gas concentrations were negligible and  
218 so were not further considered. Gas exchange at the surface of the liquid was assumed  
219 to be quasi-equilibrated and was modeled kinetically using Henry's law constants as  
220 constraints. See **Supplementary Methods S11** for more details.

### 221 2.3. MODEL PARAMETERIZATION

222 Due to the difficulty of parameter estimation for large-scale kinetic models and  
223 the model equations being inherently underdetermined by the data, this work employed

224 an ensemble modeling approach in which many models, known as an “ensemble” of  
225 models, each with the same structure but with independent parameter sets, are used  
226 simultaneously. This approach not only alleviates the difficulty of finding a single set of  
227 parameters that accurately describes the experimental data, but also acknowledges the  
228 inability to determine a single optimal parameter value, known as parameter identifiability  
229 or observability, that is a hallmark of large-scale kinetic models and provides a metric by  
230 which uncertainty in both model parameter values and model behavior can be quantified.

231 Initial values, or parameter priors, for model dissociation constants were set to  
232 experimentally measured Michaelis constants from BRENDA (Chang et al., 2021) and  
233 MetaCyc (Caspi et al., 2014) when available. Of the 319 dissociation constants in the  
234 model, 116 of these enzyme-substrate pairs had at least one Michaelis constant  
235 available in these databases. When multiple experimental values were available, the  
236 geometric mean was used. Where literature values were not available, the  
237 corresponding dissociation constant was set to 0.1 mM, which was the median value of  
238 all measured Michaelis constants (see **Supplementary Table S9 and S10** for all initially  
239 available literature values). Of the 100 inhibition constants in the model, 13 values were  
240 available on either BRENDA or MetaCyc, and the remainder were initially set to 0.5 mM,  
241 which was the median value of the available constants.

242 Because turnover numbers are typically reported as specific quantities relative to  
243 enzyme levels, the use of literature values for rate constants would require accurate and  
244 broad proteomics for the cell-free experimental system, which were not available.  
245 Instead, rate constants in a previously published model of cell-free protein synthesis  
246 from Horvath, *et al.* (Horvath et al., 2020), which contained many of the same reactions  
247 in central *E. coli* metabolism, were used as parameter priors. For reactions used in this  
248 work that were not in the Horvath model, the initial parameter prior was set to the  
249 geometric mean of all rate constants in the Horvath model. The direct use of the Horvath

250 rate constants in our model gave very poor fit to our data, as the data fit by the Horvath  
251 model qualitatively differed from this study due to various experimental differences.  
252 Nonetheless, the Horvath parameter values provided an initial point from which  
253 parameters in this study could be further tuned.

254       Once priors for all parameters were obtained (**Figure 2a**), a single parameter set  
255 was generated by sampling all model parameters within one order of magnitude in each  
256 direction of each prior. Within each reaction, these parameters were further constrained  
257 by the Haldane relationship, which provided physiological feasibility by ensuring  
258 consistency with known thermodynamics. This equation related the equilibrium constant  
259 in reaction  $j$  ( $K_{eq,j}$ ) with the forward and reverse rate constants ( $V_{max,f}$ ,  $V_{max,r}$ ) and the  
260 dissociation constants for each substrate or product  $i$  in reaction  $j$  ( $K_{d,j,i}$ ) along with their  
261 stoichiometry ( $S_{i,j}$ ) and is given below in Eq. 1 (see **Supplementary Methods S3** for  
262 details). Equilibrium constants were calculated using eEquilibrator 3.0 (Beber et al.,  
263 2022).

$$K_{eq,j} = \frac{V_{max,f}}{V_{max,r}} \prod_{i \in \{substrates, products\}} K_{d,j,i}^{S_{i,j}}$$

264 [ 1 ]

265       This procedure was repeated to generate an ensemble of  $10^7$  independent  
266 parameter sets (**Figure 2b**). Each parameter set was simulated by integrating the  
267 system of ordinary differential equations (ODEs) which describe the change of each  
268 metabolite concentration over time (**Figure 2c**) and were solved in MATLAB 2020b (The  
269 MathWorks, Natick, MA) (**Supplementary Methods S7**). Initial ODE metabolite  
270 concentrations were set, in order of priority, first by available measurements, then by  
271 experimentally added concentrations, and finally by known *E. coli* intracellular  
272 concentrations as measured by (Bennett et al., 2009), corrected for dilution. Any

273 metabolite not in any of these categories was set to 0 mM. Initial concentrations of gas  
274 species were set to atmospheric conditions, and aqueous gases were set to equilibrium  
275 concentrations via Henry's Law. See **Supplementary Table S7** for values for each  
276 model metabolite.

277 The performance of each parameter set was quantified by the weighted root  
278 mean squared errors (RMSE) of the simulated metabolite profiles to experimental  
279 metabolite measurements across both experimental conditions. The RMSE values for  
280 succinate were weighted 6-fold compared to other metabolites due to poor fit to  
281 succinate measurements in early models, and the RMSE for butanol were weighted 20-  
282 fold because butanol production was emphasized in this model (**Supplementary**  
283 **Methods S8**). The ensemble was “screened” by keeping only the 100 parameter sets  
284 with the lowest weighted RMSE, which were used for further optimization and analysis.

285 Because models generated from the initial parameter priors failed to adequately  
286 fit the experimental data, sensitivity analysis was performed to adjust parameter priors.  
287 The finite differences method was used to calculate the sensitivity of model fitness with  
288 respect to each parameter value (**Supplementary Methods S6**) and was applied to all  
289 models in the final screened ensemble. The priors for any parameters that were highly  
290 sensitive across most models in the ensemble were then adjusted in the direction of  
291 improved fitness to the data (**Figure 2d**).

292 After iterating this procedure to update parameter priors, the fit of all models to  
293 the data remained poor. To remedy this, we applied a local parameter optimization to  
294 each of the top 200 models in the screened ensemble (**Figure 2e**). In this procedure,  
295 each screened model was used as the initial point in the MATLAB pattern search  
296 algorithm, which attempts to find a local optimum fitness value by using heuristics to  
297 traverse the parameter space. This algorithm showed better performance than both  
298 particle swarm and genetic algorithm global search methods as well as simpler local

299 search methods, such as MATLAB's "fmincon". Individual parameter constraints were  
300 applied to ensure rate constants, dissociation constants, and inhibition constants stayed  
301 in physiologically realistic ranges, and parameters were log-transformed to allow the  
302 Haldane relationship to be applied as a set of linear inequality constraints within the  
303 optimization algorithm (see **Supplementary Methods S4** for details on optimization  
304 constraints).

305 Local parameter optimization was carried out on MATLAB 2020b on the  
306 Northwestern Quest High Performance Computing Cluster. Each of the 200 optimization  
307 runs employed parallelization within the "pattern search" toolbox and ran on 250 CPUs  
308 with a wall time of 4 hours. After optimization, each parameter set was re-ranked  
309 according to the weighted RMSE fitness of the optimized point. The top 20 optimized  
310 models were chosen for the final ensemble and further analysis, as these models  
311 showed the strongest agreement to the experimental timecourse metabolite  
312 measurements in addition to capturing a distinct shift in acetate and succinate  
313 production in the butanol-negative condition.

#### 314 2.4. METABOLIC CONTROL ANALYSIS

315 Metabolic control analysis (MCA) is a means of measuring how network features,  
316 such as metabolite concentrations, reaction fluxes, and model parameters, impact each  
317 other. This analysis can be either local, such as concentration elasticities ( $\epsilon_{ji}^x$ ), which  
318 describe the change in reaction flux caused by those concentrations or parameters  
319 within that reaction, or they can be global, such as flux control coefficients ( $C_{ij}^J$ ),  
320 concentration control coefficients ( $C_{ij}^x$ ), and the Jacobian ( $J_{ii'}$ ), which describe how  
321 changes in each concentration or flux affect distant network features through shared  
322 metabolites. The definitions of each normalized value, in terms of metabolite  
323 concentrations  $x_i$  and  $x_{i'}$  and reaction fluxes  $v_j$  and  $v_{j'}$ , as given in Equations 2-5 below:

$$\epsilon_{ji}^x = \frac{x_i \partial v_j}{v_j \partial x_i}$$

324 [ 2 ]

$$C_{ij}^x = \frac{v_j \partial x_i}{x_i \partial v_j}$$

325 [ 3 ]

$$C_{jj'}^v = \frac{v_{j'} \partial v_j}{v_j \partial v_{j'}}$$

326 [ 4 ]

$$J_{ii'} = \frac{x_{i'}}{x_i} \frac{\partial}{\partial x_{i'}} \left( \frac{\partial x_i}{\partial t} \right)$$

327 [ 5 ]

328 The above MCA features were calculated analytically, as described in (Hofmeyr,  
329 2001) and detailed in **Supplementary Methods S5**. Because the system in this model is  
330 dynamic, these values were calculated at discrete timepoints for every 0.5 hours  
331 between 0 and 24 hours in the model simulation. In all analyses presented in this work,  
332 only values calculated between 0.5 hours and 7.5 hours are presented, since values  
333 calculated at 0 hours caused numerical instability from initial concentrations of zero, and  
334 values after 7.5 hours showed wide variation due to the lack of experimental data  
335 between 8 and 20 hours to constrain model behavior.

336

### 337 3. RESULTS

#### 338 3.1. DYNAMIC MODEL FITTING AND GOODNESS OF FIT

339 To train our dynamic model of cell-free metabolism, we iterated the process of  
340 sampling around parameter priors to generate an ensemble, screening the ensemble  
341 against the experimental data, and updating the parameter priors using parameter

342 sensitivity analysis fifteen times until the model adequately fit the metabolite data (see  
343 **Supplementary Table S9** for each iteration of parameter priors). From this iteration, the  
344 top 200 screened parameter sets (of  $10^8$  sampled) showed significantly improved fit to  
345 the nine measured metabolites in the butanol-positive condition, with a 32% reduction in  
346 the median weighted RMSE compared to screened parameter sets from early iterations  
347 **(Supplementary Table S1)**. However, the experimental data from the butanol-negative  
348 condition showed a large increase in acetate accumulation and a decrease in succinate  
349 accumulation as compared to the butanol-positive condition, which were not captured by  
350 any of the top 200 parameter sets **(Supplementary Fig. S3)**. These shifts in metabolism  
351 were difficult to capture in part because the measured increase in acetate could not  
352 simply be accounted for from the measured decrease in butanol. Additionally, previous  
353 experimental data showed that changes in acetate and succinate titers – as well as  
354 ethanol and lactate, to a lesser extent – were correlated with changes in butanol titers  
355 **(Supplementary Fig. S2)**, which implied that system-level effects were coupling the  
356 production of all these metabolites.

357 We next employed automated parameter optimization algorithms to fine-tune  
358 each parameter set and found that the local optimization “pattern search” algorithm (The  
359 Mathworks, Inc.) significantly improved the weighted RMSE of nearly all models,  
360 reducing the weighted RMSE a further 46% **(Supplementary Table S1)**. We found that  
361 the top 20 parameter sets (in terms of post-optimization weighted RMSE) captured the  
362 experimentally observed shifts in acetate and succinate as well as all other  
363 experimentally measured metabolites **(Figure 3)**. Importantly, the combination of  
364 ensemble screening and local parameter optimization was found to be necessary to  
365 successfully fit both positive and negative butanol production conditions, as each  
366 method alone was not sufficient to fit the data, even when sampling around the final  
367 updated parameter priors **(Supplementary Fig. S4)**.

## 368 3.2. ANALYSIS OF CELL-FREE METABOLISM AND THE BUTANOL PATHWAY

369 With a trained ensemble of 20 parameter sets, we wanted to understand how  
370 simulated metabolism was able to fit experimental metabolite measurements. The most  
371 interesting behaviors of this data were the shifts in acetate and succinate concentrations  
372 in the butanol-negative condition compared to the butanol-positive condition. Our models  
373 suggest that acetate accumulation in the butanol-negative condition is due to increased  
374 acetyl-CoA concentration (**Supplementary Fig. S5**), which itself is caused by the lack of  
375 acetyl-CoA flux into the butanol pathway; these conclusions are supported by the high  
376 control of acetyl-CoA concentration by butanol concentration in MCA, as well as pathway  
377 flux analysis (**Supplementary Fig. S6**; **Supplementary Methods S9**). Next, by  
378 decomposing the reactions for succinate production into “elementary” (forward and  
379 reverse) fluxes, we observed that the decrease in succinate production in the butanol-  
380 negative condition was not from lowered “forward” reaction fluxes but instead from  
381 increased “reverse” flux of succinyl-CoA synthase (in the direction of succinyl-CoA from  
382 succinate) (**Supplementary Fig. S7a**). This reverse flux – equivalent to product  
383 inhibition – was attributable to an increase in free Coenzyme A (CoA) (**Supplementary**  
384 **Fig. S7b**) and was confirmed with MCA showing strong negative control over this  
385 reaction by CoA (**Supplementary Fig. S7c**). The increase in CoA, in turn, is caused by  
386 the increase in phosphotransacetylase (PTA) flux in the acetate pathway from the  
387 butanol pathway knockout, which can be seen both in the high concentration control  
388 coefficient of CoA from PTA (**Supplementary Fig. S7c**) and the reactions that contribute  
389 to changes in acetyl-CoA concentration (**Supplementary Fig. S6b**).

390 Significantly, the increases in acetyl-CoA and CoA in the butanol-negative  
391 condition – which are responsible for the increase in acetate and decrease in succinate,  
392 respectively – are not trivial consequences of the butanol pathway knockout in the  
393 negative condition, as the butanol pathway uses acetyl-CoA and releases CoA in the



394 same stoichiometric ratios as the acetate pathway. Instead, our model analysis found  
395 that these shifts are only possible due to a bottleneck in the butanol pathway wherein  
396 intermediates were accumulated, causing butanol pathway flux to have a net decrease  
397 in the quasi-steady state concentrations of both acetyl-CoA and CoA, as compared to  
398 acetate pathway flux (**Supplementary Fig. S8a**). This prediction of butanol pathway  
399 intermediate accumulation was conserved among all 20 parameter sets and will be  
400 discussed further in the context of predictions for pathway optimization.

401 Beyond acetate and succinate shifts, carbon metabolism within the model  
402 remains a highly connected, balanced network. Strong control of butanol production is  
403 maintained among all models in the final ensemble, with consistent control by  
404 acetaldehyde dehydrogenase (ACALD), NAD dehydrogenase (NADH16pp), malate  
405 dehydrogenase (MDH), and NAD-dependent malic enzyme (ME1) (**Supplementary Fig.**  
406 **S8b**). However, this control varies in direction (i.e., some models have parameters  
407 where this control is positive and others where the control is negative) suggesting  
408 several possible control mechanisms. Ethanol production is even more tightly controlled,  
409 which allows the model to fit experimental observations of unchanged ethanol production  
410 between conditions despite changing acetyl-CoA concentration. MCA shows that this  
411 effect is due to saturation of the first step of ethanol production (ACALD) by acetyl-CoA,  
412 as well as further distributed control over ethanol production across ACALD,  
413 glyceraldehyde-3-phosphate dehydrogenase (GAPD), fructose biphosphatase (FBP),  
414 pyruvate dehydrogenase (PDH), and NADH16pp fluxes (**Supplementary Fig. S12**). In  
415 contrast, the production of lactate is not strongly controlled by other reactions, as can be  
416 seen in the very low flux control coefficients for lactate dehydrogenase (LDH)  
417 (**Supplementary Fig. S9a**), but is instead more strongly controlled by NADH than by  
418 pyruvate or other metabolites (**Supplementary Fig. S9b**). This finding suggesting that  
419 lactate production stops at the same time as glycolytic flux not because of lack of

420 pyruvate, but instead due to lack of NADH regeneration in glycolysis, which thereby  
421 lowers the NADH:NAD<sup>+</sup> ratio and brings LDH flux into equilibrium. Lastly, the  
422 consumption of glucose itself shows a large amount of metabolic control from  
423 NADH16pp, GAPD, TPI, FBP, PTA, and HEX fluxes (**Supplementary Fig. S10**), which  
424 are important reactions in the control of the other measured metabolites discussed  
425 above. GAPD and TPI are both interesting cases, as they are thermodynamic  
426 bottlenecks with large positive Gibbs free energies (Beber et al., 2022). While some  
427 previous literature has suggested that glycolysis in *E. coli* is predominately controlled by  
428 the rate of ATP consumed outside of glycolysis itself (Solem et al., 2003), other work has  
429 identified GAPD as a key controlling and limiting step of glycolysis, both in *E. coli*  
430 (Centeno-Leija et al., 2013; Cho et al., 2012) and in other organisms (Shestov et al.,  
431 2014). In the context of metabolism in the cell-free system described here, this finding  
432 would indicate that GAPD flux, and the NADH generated by this reaction, is the  
433 dominant factor controlling glycolytic flux.

### 434 3.3. Model Predictions for Optimization of Butanol Production

435 Kinetic models offer advantages in their ability to extrapolate and make  
436 predictions about unseen experimental conditions (J. L. Greene et al., 2017; Strutz et al.,  
437 2019). Here, we simulate several new experimental conditions (e.g., altering butanol  
438 pathway enzyme concentrations and the initial concentrations of metabolites) that aim to  
439 increase butanol production. In the cell-free reaction, the concentrations of heterologous  
440 enzymes are easily perturbed while the enzymes in core metabolism are fixed. We  
441 therefore first used our model to adjust the levels of all five butanol pathway enzymes at  
442 0.5x, 2x, 5x, and 10x fold-changes from the baseline butanol-positive condition (**Figure**  
443 **4**). Within the model, these conditions were simulated by adjusting the forward and  
444 reverse rate constant parameters ( $V_{max}$ ) of the corresponding reactions. When changing

445 all enzymes simultaneously, we found that final 20-hour butanol titers were predicted to  
446 increase monotonically with increasing butanol pathway enzyme levels but all models  
447 show diminishing returns at the highest levels of enzyme overexpression, implying that  
448 heterologous pathway enzymes become no longer limiting. When increasing each  
449 butanol pathway enzyme individually, all models in the final ensemble predicted that  
450 increasing the bi-functional aldehyde-alcohol dehydrogenase, which carries out the final  
451 two reactions in the butanol pathway, ADHE1 and ADHE2, gave a much larger  
452 improvement in butanol titer than increasing any other butanol pathway enzyme (**Figure**  
453 **4**).

454 As previously mentioned, all parameter sets predicted that a bottleneck to  
455 accumulate intermediates in the butanol pathway was needed to fit the observed shifts in  
456 acetate and succinate production. Interestingly, despite the lack of enzyme-specific  
457 training data, all parameter sets further agreed that this bottleneck would accumulate  
458 butyryl-CoA and butyraldehyde, the substrates to ADHE1 and ADHE2, respectively  
459 (**Supplementary Fig. S8a**). To understand this model behavior, we performed a  
460 thermodynamic analysis of the butanol pathway. This analysis showed that the first step  
461 of the pathway, THL ( $\Delta G'^m = +23$  kJ/mol), and the second step, HBD ( $\Delta G'^m = -20$   
462 kJ/mol), must be kinetically fast and therefore near equilibrium to establish flux into the  
463 butanol pathway. Similarly, the third step of the pathway, CRT, is only slightly exergonic  
464 ( $\Delta G'^m = -1.0$  kJ/mol), and so the first three steps of the pathway are at quasi-equilibrium,  
465 and the fourth step (TER) is again quite favorable ( $\Delta G'^m = -61$  kJ/mol). The quasi-  
466 equilibrium of the first three reactions means that any bottleneck in these reactions or  
467 the subsequent fourth reaction would not result in accumulation of intermediates but  
468 would equilibrate back to acetyl-CoA, preventing the shifts seen in the data. Therefore,  
469 bottlenecks responsible for accumulation were only possible in the last two steps of  
470 ADHE1 and ADHE2 ( $\Delta G'^m = -10$  kJ/mol and  $\Delta G'^m = -25$  kJ/mol, respectively) once flux

471 was effectively irreversible. For this reason, the alcohol-aldehyde dehydrogenase  
472 represents the primary enzyme bottleneck in the butanol pathway, and its  
473 overexpression is consistently predicted to have the only significant impact on increased  
474 butanol production, which is validated by previous experimental observations (Karim &  
475 Jewett, 2016). These results provide valuable knowledge that can be leveraged  
476 experimentally when expression and solubility of the enzyme are not limiting.

477 We next used the models to predict the effect of changing the initial cofactor and  
478 substrate concentrations. First, titrations were simulated for the initial concentration of  
479 acetyl-CoA, CoA, ATP, ADP, AMP, NADH, NAD<sup>+</sup>, NADPH, NADP<sup>+</sup>, pyruvate,  
480 phosphoenolpyruvate, inorganic phosphate, and pyrophosphate (**Supplementary Fig.**  
481 **S11**). While parameter sets did not have the same consensus as for enzyme level  
482 predictions, the simulated initial concentrations of 50 mM NADH (compared to 0.1 mM in  
483 the base condition of butanol-positive condition), 50 mM ATP (0.1 mM in the base  
484 condition), 15 mM CoA (4.4 mM in the base condition), and 50 mM pyrophosphate (0  
485 mM in the base condition) all predicted increases in butanol titer to varying degrees. We  
486 then simulated butanol production with these new combinatorial conditions which  
487 predicted the highest median butanol production (**Figure 5**). These cofactors have  
488 previously been found experimentally to be the most important additions for controlling  
489 cell-free metabolism (Karim et al., 2018). For high initial NADH, butanol titer is increased  
490 both by competitively inhibiting PTA and providing reduction potential to relieve the  
491 ADHE1 and ADHE2 bottleneck. The increase in CoA increases butanol titers primarily  
492 by increasing pyruvate flux to acetyl-CoA via pyruvate dehydrogenase and indirectly  
493 increasing NADH through increased flux in AKGDH. High pyrophosphate was predicted  
494 to decrease acetyl-CoA synthase flux and minimize futile cycling. Lastly, high initial ATP  
495 was predicted to increase butanol production by inhibiting PTA and LDH flux  
496 (**Supplementary Fig. S11b**), though it should be noted that this trend for ATP in

497 particular was not observed in previous experimental studies of related cell-free systems  
498 (Karim et al., 2018; Karim & Jewett, 2016). Next, we varied initial concentrations of  
499 glucose, acetate, and glutamate (**Figure 5**). While glucose was seen to have the  
500 largest effect on final butanol titer, the correlation was not linear. For example, a 62%  
501 decrease in initial glucose resulted in a 34% decrease in final butanol titer in the median  
502 across parameter sets, with one parameter set even showing an increase in butanol titer  
503 from this decreased glucose.

#### 504 3.4. ANALYSIS OF PARAMETER OPTIMIZATION AND CONSERVATION OF PARAMETER 505 VALUES

506 Virtually all large-scale kinetic models are vastly underdetermined and individual  
507 parameters are not identifiable, thus limiting the interpretability of individual parameter  
508 values. Because we used an ensemble approach, we have an opportunity to study how  
509 parameter values and network features are constrained – or unconstrained – as a result  
510 of undertaking this type of model fitting. For a given parameter, the conserved prediction  
511 of similar parameter values across the ensemble may support several conclusions,  
512 including increased confidence in a true physiological parameter value, increased  
513 structural identifiability due to network structure or reaction mechanisms, or increased  
514 practical identifiability due to proximity to observed data. In all cases, these are important  
515 factors in model building and analysis, and these results may help increase  
516 understanding in these areas.

517 Here, we measure how tightly or loosely constrained individual parameter values  
518 are between the parameter sets in the final ensemble to understand how the data might  
519 constrain certain parameter values, or conversely, how different parameter values might  
520 give similar model behaviors. However, because individual parameter values are highly  
521 context-dependent, and the effect of a parameter on model responses cannot be

522 determined from the absolute parameter value alone, it is instead preferable to use  
523 proxy values for each parameter which are more representative of network behavior.

524 We first used as a proxy the metric of concentration elasticity, which relates the  
525 response in reaction flux to the value of each dissociation constant parameter and  
526 normalizes all parameters for better comparison. This metric further allows analysis of  
527 the degree to which parameters control various reactions, as elasticity values near 0  
528 signify saturated substrates, elasticities near 1 signify substrate concentrations far below  
529 saturation in a first-order regime, and intermediate elasticities represent substrates with  
530 more control over reaction rates. After performing this analysis on the ensemble of 20  
531 models, we saw that there were several parameters whose corresponding elasticity  
532 values were highly conserved. This result is summarized in **Figure 5**, which plots the  
533 mean value of each elasticity against the standard deviation across the 20 models in the  
534 final ensemble. Further discussion of specific examples of conserved elasticities is given  
535 in **Supplementary Table S2**, and the full presentation of elasticities for all reactions  
536 across all models are shown in **Supplementary Table S4** and **Supplementary Fig.**  
537 **S12**.

538 Next, we used as a proxy the metric of parameter sensitivity with respect to  
539 NADH oxidative flux (**Supplementary Methods S10**). Because this value is  
540 physiologically relevant and yet was not directly constrained or favored by the model  
541 fitting process, this provides an additional unbiased metric to analyze the extent to which  
542 parameter values are constrained. Again, there were several parameters whose  
543 sensitivity to this behavior were relatively conserved, which is summarized in  
544 **Supplementary Table S3**, with all values given in **Supplementary Table S5** and shown  
545 in **Supplementary Fig. S13**.

## 546 4. DISCUSSION

### 547 4.1. SIGNIFICANCE OF WORK

548           In this work, we successfully fit a large-scale dynamic model to multiple  
549 conditions of experimental time course metabolite measurements. The resulting model  
550 captured complex, unintuitive interactions between various branches of metabolism and  
551 was able to further provide predictions as to the metabolic phenomena underlying these  
552 effects. The ensemble approach was leveraged to provide quantitative measurements of  
553 the uncertainty of these predictions; somewhat surprisingly, the predictions around both  
554 the metabolic behaviors in the training data, as well as the predicted effects of  
555 hypothetical enzyme level changes, were much more conserved within the ensemble  
556 than initially expected, demonstrating high certainty in these predictions. The final model  
557 produced several other optimization strategies with varying degrees of ensemble  
558 uncertainty that may be used in future work to increase butanol production and further  
559 retrain this model.

#### 560 4.2. ADVANTAGES AND LIMITATIONS

561           The most significant advantage of the methodology of this work was the use of  
562 the ensemble approach. First, this approach allows for a thorough sampling of  
563 parameter space, which was seen to be necessary to provide adequate initial points for  
564 subsequent optimization (**Supplementary Fig. S4**). Second, it allows quantification of  
565 the uncertainty in both model parameters and model predictions, such as the increased  
566 confidence in the predicted effect of butanol enzyme level changes. Third, the ensemble  
567 approach allows for uncertain predictions to be hedged, such that even predictions  
568 which vary between models can provide utility. For example, lower-confidence  
569 predictions can be tested to improve butanol production, and in the worst-case scenario  
570 will still provide valuable training data to refine the ensemble. This ease of re-  
571 optimization by local optimization is also a significant advantage of this work which can  
572 increase the speed of model-building in the design-build-test-learn cycle.

573 Another advantage of this work is the scalability and utility of additional  
574 experimental data. The above analysis found that the most highly constrained  
575 parameters were in reactions near experimentally measured metabolites, which implies  
576 that currently under-constrained parameters can be fine-tuned simply by obtaining more  
577 experimental measurements. The resulting tightening of parameter constraints should  
578 give more accurate and conserved predictions across models. Simultaneously, a well-fit  
579 model was obtained in this work despite measurements from relatively few metabolites,  
580 so while additional measurements may have benefits, they should not be seen as a  
581 reason not to undertake similar model-fitting efforts.

582 One primary limitation in this work, common to many large-scale models, is the  
583 manual process of model selection. While there have been early efforts to use  
584 automated model reconstruction tools on kinetic models (van Rosmalen et al., 2021),  
585 their widespread use remains limited to constraint-based models with steady-state data  
586 (Mendoza et al., 2019), and while parameter identifiability tools have seen great  
587 improvements, they still scale poorly for larger models, especially those with complex  
588 rate forms (Villaverde et al., 2019). Therefore, model selection remains an iterative  
589 process which must balance reducing the number of parameters with leaving enough  
590 reactions to allow the model sufficient flexibility to fit the data. For the “bottom-up”  
591 parameterization in this work, the choice of reactions was further complicated by the  
592 choice of parameter priors, especially where data could be fit in multiple ways. For  
593 example, our model included both hexokinase (HEX) and the glucose  
594 phosphotransferase system (PTS) as reactions to consume glucose. While we chose  
595 higher rate constants for HEX, as we believed it unlikely that the multi-step, membrane-  
596 bound PTS was highly active in cell-free extracts, a different choice may have led to a  
597 different final model. Similarly, model predictions of succinate production from glutamate  
598 versus from TCA flux may have been biased by parameter priors. Despite this potential



599 uncertainty, in this work we saw that these two decisions had minimal impact: in the first  
600 case, the primary reaction for glucose consumption did not significantly affect model  
601 predictions surrounding butanol optimization (**Supplementary Fib. S14**), and in the  
602 second case, nearly all parameter sets, once optimized, utilized glutamate as the  
603 primary source of succinate flux. Regardless, this fortunate result is not guaranteed for  
604 future efforts, and so careful consideration of model selection, along with the potential  
605 use of automated model construction or parameter identifiability methods, model  
606 reduction methods (Strutz et al., 2019) and increasingly approximate rate forms (Du et  
607 al., 2016; St John et al., 2019) should all be considered.

608         In conclusion, while there are certainly improvements to be made in future  
609 modeling efforts, this work demonstrates the successful parameterization of a large-  
610 scale dynamic kinetic model to capture complex metabolic data. The resulting model has  
611 increased realism and confidence due to improved literature value parameter priors and  
612 rigorously applied thermodynamic constraints. This model was used to gain new causal  
613 understanding of metabolism in cell-free systems and how this metabolism interacts with  
614 the engineered butanol pathway. This understanding was further leveraged to provide  
615 strategies to optimize butanol titers, including the prediction that the alcohol/aldehyde  
616 enzyme was the primary bottleneck of the butanol pathway, which itself was unique and  
617 unanticipated due to its high conservation across models despite the lack of direct  
618 training data. Lastly, the final trained model was used for a large-scale analysis of the  
619 degree to which individual parameter values are constrained during model fitting, which  
620 has broad implications in kinetic models in general. We hope that the success,  
621 applicability, and general ease of use of these methods and results will inspire additional  
622 experiments to measure dynamic behaviors around engineered pathways in metabolism  
623 for the purpose of continued model building and improved metabolic understanding.

624 CONTRIBUTION STATEMENT

625 Jacob Martin: Conceptualization, Methodology, Software, Formal analysis, Writing –  
626 Original Draft.

627 Blake J. Rasor: Data Collection, Writing – review & editing.

628 Jon DeBonis: Methodology, Software, Writing – review & editing.

629 Ashty Karim: Data Collection, Writing – review & editing.

630 Michael Jewett: Supervision, Funding acquisition, Writing – review & editing.

631 Keith Tyo: Conceptualization, Supervision, Writing – review & editing.

632 Linda Broadbelt: Conceptualization, Supervision, Writing – review & editing.

633 COMPETING INTERESTS

634 The authors claim no competing interests.

635 ACKNOWLEDGEMENTS

636 We would like to thank Prof. Niall Mangan, Prof. Matthew Plumlee, and Prof.  
637 Andreas Waechter for project guidance and helpful discussions. Thanks to Jon Strutz  
638 and Kevin Shebek for helpful discussions and assistance with software and eQuilibrator  
639 3.0.

640 This research was supported in part through the computational resources and  
641 staff contributions provided for the Quest high performance computing facility at  
642 Northwestern University which is jointly supported by the Office of the Provost, the Office  
643 for Research, and Northwestern University Information Technology. This work was  
644 funded by the U.S. Department of Energy Office of Science, Biological and  
645 Environmental Research Division (BER), Genomic Science Program (GSP) under  
646 Contract No. DE-SC0018249. M.C.J. gratefully acknowledges the David and Lucile  
647 Packard Foundation and the Camille Dreyfus Teacher–Scholar Program. J.P.M. was  
648 supported by a National Institutes of Health Training Grant (T32GM008449) through  
649 Northwestern University’s Biotechnology Training Program. B.J.R. was supported by a

650 National Defense Science and Engineering Graduate Fellowship (Award ND-CEN-017-

651 095).

652

653 REFERENCES

- 654 Arvay, E., Biggs, B. W., Guerrero, L., Jiang, V., & Tyo, K. (2021). Engineering  
655 *Acinetobacter baylyi* ADP1 for mevalonate production from lignin-derived aromatic  
656 compounds. *Metabolic Engineering Communications*, 13(May 2020), e00173.  
657 <https://doi.org/10.1016/j.mec.2021.e00173>
- 658 Atsumi, S., Cann, A. F., Connor, M. R., Shen, C. R., Smith, K. M., Brynildsen, M. P.,  
659 Chou, K. J. Y., Hanai, T., & Liao, J. C. (2008). Metabolic engineering of *Escherichia*  
660 *coli* for 1-butanol production. *Metabolic Engineering*, 10(6), 305–311.  
661 <https://doi.org/10.1016/j.ymben.2007.08.003>
- 662 Beber, M. E., Gollub, M. G., Mozaffari, D., Shebek, K. M., Flamholz, A. I., Milo, R., &  
663 Noor, E. (2022). eEquilibrator 3.0: a database solution for thermodynamic constant  
664 estimation. *Nucleic Acids Research*, 50(D1), D603–D609.  
665 <https://doi.org/10.1093/nar/gkab1106>
- 666 Bennett, B., Kimball, E., Gao, M., Osterhout, R., Van Dien, S. J., & Rabinowitz, J. D.  
667 (2009). Absolute metabolite concentrations and implied enzyme active site  
668 occupancy in *Escherichia coli*. *Nature Chemical Biology*, 5(8), 593–599.  
669 <https://doi.org/10.1038/nchembio.186.Absolute>
- 670 Biggs, B. W., Alper, H. S., Pfleger, B. F., Tyo, K. E. J., Santos, C. N. S., Ajikumar, P. K.,  
671 & Stephanopoulos, G. (2021). Enabling commercial success of industrial  
672 biotechnology. *Science*, 374(6575), 1563–1565.  
673 <https://doi.org/10.1126/science.abj5040>
- 674 Bowie, J. U., Sherkanov, S., Korman, T. P., Valliere, M. A., Opgenorth, P. H., & Liu, H.  
675 (2020). Synthetic Biochemistry: The Bio-inspired Cell-Free Approach to Commodity  
676 Chemical Production. *Trends in Biotechnology*, 38(7), 766–778.  
677 <https://doi.org/10.1016/j.tibtech.2019.12.024>
- 678 Buffing, M. F., Link, H., Christodoulou, D., & Sauer, U. (2018). Capacity for

- 679 instantaneous catabolism of preferred and non-preferred carbon sources in  
680 *Escherichia coli* and *Bacillus subtilis*. *Scientific Reports*, 8(1), 1–10.  
681 <https://doi.org/10.1038/s41598-018-30266-3>
- 682 Bujara, M., Schümperli, M., Pellaux, R., Heinemann, M., & Panke, S. (2011).  
683 Optimization of a blueprint for in vitro glycolysis by metabolic real-time analysis.  
684 *Nature Chemical Biology*, 7(5), 271–277. <https://doi.org/10.1038/nchembio.541>
- 685 Caspi, R., Altman, T., Billington, R., Dreher, K., Foerster, H., Fulcher, C. A., Holland, T.  
686 A., Keseler, I. M., Kothari, A., Kubo, A., Krummenacker, M., Latendresse, M.,  
687 Mueller, L. A., Ong, Q., Paley, S., Subhraveti, P., Weaver, D. S., Weerasinghe, D.,  
688 Zhang, P., & Karp, P. D. (2014). The MetaCyc database of metabolic pathways and  
689 enzymes and the BioCyc collection of Pathway/Genome Databases. *Nucleic Acids*  
690 *Research*, 42(D1), 459–471. <https://doi.org/10.1093/nar/gkt1103>
- 691 Centeno-Leija, S., Utrilla, J., Flores, N., Rodriguez, A., Gosset, G., & Martinez, A.  
692 (2013). Metabolic and transcriptional response of *Escherichia coli* with a NADP +-  
693 dependent glyceraldehyde 3-phosphate dehydrogenase from *Streptococcus*  
694 *mutans*. *Antonie van Leeuwenhoek, International Journal of General and Molecular*  
695 *Microbiology*, 104(6), 913–924. <https://doi.org/10.1007/s10482-013-0010-6>
- 696 Chang, A., Jeske, L., Ulbrich, S., Hofmann, J., Koblitz, J., Schomburg, I., Neumann-  
697 Schaal, M., Jahn, D., & Schomburg, D. (2021). BRENDA, the ELIXIR core data  
698 resource in 2021: New developments and updates. *Nucleic Acids Research*,  
699 49(D1), D498–D508. <https://doi.org/10.1093/nar/gkaa1025>
- 700 Cho, H. S., Seo, S. W., Kim, Y. M., Jung, G. Y., & Park, J. M. (2012). Engineering  
701 glyceraldehyde-3-phosphate dehydrogenase for switching control of glycolysis in  
702 *Escherichia coli*. In *Biotechnology and Bioengineering* (Vol. 109, Issue 10, pp.  
703 2612–2619). <https://doi.org/10.1002/bit.24532>
- 704 Chung, H., Yang, J. E., Ha, J. Y., Chae, T. U., Shin, J. H., Gustavsson, M., & Lee, S. Y.

- 705 (2015). Bio-based production of monomers and polymers by metabolically  
706 engineered microorganisms. *Current Opinion in Biotechnology*, 36, 73–84.  
707 <https://doi.org/10.1016/j.copbio.2015.07.003>
- 708 Cornish-Bowden, A. (1979). Chapter 6 - Two-substrate reactions. In A. Cornish-Bowden  
709 (Ed.), *Fundamentals of Enzyme Kinetics* (pp. 99–129). Butterworth-Heinemann.  
710 <https://doi.org/https://doi.org/10.1016/B978-0-408-10617-7.50011-0>
- 711 Costa, R. S., Hartmann, A., & Vinga, S. (2016). Kinetic modeling of cell metabolism for  
712 microbial production. *Journal of Biotechnology*, 219, 126–141.  
713 <https://doi.org/10.1016/j.jbiotec.2015.12.023>
- 714 Du, B., Zielinski, D. C., Kavvas, E. S., Dräger, A., Tan, J., Zhang, Z., Ruggiero, K. E.,  
715 Arzumanyan, G. A., & Palsson, B. O. (2016). Evaluation of rate law approximations  
716 in bottom-up kinetic models of metabolism. *BMC Systems Biology*, 10(1), 40.  
717 <https://doi.org/10.1186/s12918-016-0283-2>
- 718 Dudley, Q. M., Karim, A. S., & Jewett, M. C. (2015). Cell-free metabolic engineering:  
719 Biomanufacturing beyond the cell. *Biotechnology Journal*, 10(1), 69–82.  
720 <https://doi.org/10.1002/biot.201400330>
- 721 Dudley, Q. M., Karim, A. S., Nash, C. J., & Jewett, M. C. (2020). In vitro prototyping of  
722 limonene biosynthesis using cell-free protein synthesis. *Metabolic Engineering*,  
723 61(April), 251–260. <https://doi.org/10.1016/j.ymben.2020.05.006>
- 724 Fackler, N., Heijstra, B. D., Rasor, B. J., Brown, H., Martin, J., Ni, Z., Shebek, K. M.,  
725 Rosin, R. R., Simpson, S. D., Tyo, K. E., Giannone, R. J., Hettich, R. L.,  
726 Tschaplinski, T. J., Leang, C., Brown, S. D., Jewett, M. C., & Kodiepeke, M. (2021).  
727 Stepping on the Gas to a Circular Economy: Accelerating Development of Carbon-  
728 Negative Chemical Production from Gas Fermentation. *Annual Review of Chemical  
729 and Biomolecular Engineering*, 12, 439–470. [https://doi.org/10.1146/annurev-  
730 chembioeng-120120-021122](https://doi.org/10.1146/annurev-chembioeng-120120-021122)

- 731 Galanie, S., Thodey, K., Trenchard, I. J., Interrante, M. F., & Smolke, C. D. (2015).  
732 Complete biosynthesis of opioids in yeast. *Science*, 116(2000), 1594–1602.  
733 <https://doi.org/10.1016/j.celrep.2014.10.048>.Coupling
- 734 Gopalakrishnan, S., Dash, S., & Maranas, C. (2020). K-FIT: An accelerated kinetic  
735 parameterization algorithm using steady-state fluxomic data. *Metabolic*  
736 *Engineering*, 61(March), 197–205. <https://doi.org/10.1016/j.ymben.2020.03.001>
- 737 Greene, J., Daniell, J., Köpke, M., Broadbelt, L., & Tyo, K. E. J. (2019). Kinetic ensemble  
738 model of gas fermenting *Clostridium autoethanogenum* for improved ethanol  
739 production. *Biochemical Engineering Journal*, 148(May 2018), 46–56.  
740 <https://doi.org/10.1016/j.bej.2019.04.021>
- 741 Greene, J. L., Wächter, A., Tyo, K. E. J., & Broadbelt, L. J. (2017). Acceleration  
742 Strategies to Enhance Metabolic Ensemble Modeling Performance. *Biophysical*  
743 *Journal*, 113(5), 1150–1162. <https://doi.org/10.1016/j.bpj.2017.07.018>
- 744 Grubbe, W. S., Rasor, B. J., Krüger, A., Jewett, M. C., & Karim, A. S. (2020). Cell-free  
745 styrene biosynthesis at high titers. *Metabolic Engineering*, 61(May), 89–95.  
746 <https://doi.org/10.1016/j.ymben.2020.05.009>
- 747 Hofmeyr, J.-H. S. (2001). Metabolic control analysis in a nutshell. *Proceedings of the*  
748 *2nd International Conference on Systems Biology*, ii, 291–300.  
749 [http://www.siliconcell.net/sica/NWO-CLS/CellMath/OiOvoer/Hofmeyr\\_nutshell.pdf](http://www.siliconcell.net/sica/NWO-CLS/CellMath/OiOvoer/Hofmeyr_nutshell.pdf)
- 750 Horvath, N., Vilkhovoy, M., Wayman, J. A., Calhoun, K., Swartz, J., & Varner, J. D.  
751 (2020). Toward a genome scale sequence specific dynamic model of cell-free  
752 protein synthesis in *Escherichia coli*. *Metabolic Engineering Communications*,  
753 10(November 2018), e00113. <https://doi.org/10.1016/j.mec.2019.e00113>
- 754 Jenior, M. L., Moutinho, T. J., Dougherty, B. V., & Papin, J. A. (2020). Transcriptome-  
755 guided parsimonious flux analysis improves predictions with metabolic networks in  
756 complex environments. *PLOS Computational Biology*, 16(4), e1007099.

- 757 <https://doi.org/10.1371/journal.pcbi.1007099>
- 758 Jewett, M. C., Calhoun, K. A., Voloshin, A., Wu, J. J., & Swartz, J. R. (2008). An  
759 integrated cell-free metabolic platform for protein production and synthetic biology.  
760 *Molecular Systems Biology*, 4(220). <https://doi.org/10.1038/msb.2008.57>
- 761 Jia, G., Stephanopoulos, G., & Gunawan, R. (2012). Incremental parameter estimation  
762 of kinetic metabolic network models. *BMC Systems Biology*, 6.  
763 <https://doi.org/10.1186/1752-0509-6-142>
- 764 Karim, A. S., Dudley, Q. M., Juminaga, A., Yuan, Y., Crowe, S. A., Heggestad, J. T.,  
765 Garg, S., Abdalla, T., Grubbe, W. S., Rasor, B. J., Coar, D. N., Torculas, M., Krein,  
766 M., Liew, F. M. (Eric), Quattlebaum, A., Jensen, R. O., Stuart, J. A., Simpson, S. D.,  
767 Köpke, M., & Jewett, M. C. (2020). In vitro prototyping and rapid optimization of  
768 biosynthetic enzymes for cell design. *Nature Chemical Biology*, 16(8), 912–919.  
769 <https://doi.org/10.1038/s41589-020-0559-0>
- 770 Karim, A. S., Heggestad, J. T., Crowe, S. A., & Jewett, M. C. (2018). Controlling cell-free  
771 metabolism through physiochemical perturbations. *Metabolic Engineering*, 45(May  
772 2017), 86–94. <https://doi.org/10.1016/j.ymben.2017.11.005>
- 773 Karim, A. S., & Jewett, M. C. (2016). A cell-free framework for rapid biosynthetic  
774 pathway prototyping and enzyme discovery. *Metabolic Engineering*, 36, 116–126.  
775 <https://doi.org/10.1016/j.ymben.2016.03.002>
- 776 Karim, A. S., Rasor, B. J., & Jewett, M. C. (2019). Enhancing control of cell-free  
777 metabolism through pH modulation. *Synthetic Biology*, 5(1), 1–7.  
778 <https://doi.org/10.1093/synbio/ysz027>
- 779 Khodayari, A., Zomorodi, A. R., Liao, J. C., & Maranas, C. D. (2014). A kinetic model of  
780 Escherichia coli core metabolism satisfying multiple sets of mutant flux data.  
781 *Metabolic Engineering*, 25, 50–62. <https://doi.org/10.1016/j.ymben.2014.05.014>
- 782 Kim, O. D., Rocha, M., & Maia, P. (2018). A Review of Dynamic Modeling Approaches



- 783 and Their Application in Computational Strain Optimization for Metabolic  
784 Engineering. *Frontiers in Microbiology*, 9(July), 1–22.  
785 <https://doi.org/10.3389/fmicb.2018.01690>
- 786 Kurata, H., & Sugimoto, Y. (2018). Improved kinetic model of Escherichia coli central  
787 carbon metabolism in batch and continuous cultures. *Journal of Bioscience and*  
788 *Bioengineering*, 125(2), 251–257. <https://doi.org/10.1016/j.jbiosc.2017.09.005>
- 789 Lewis, N. E., Hixson, K. K., Conrad, T. M., Lerman, J. A., Charusanti, P., Polpitiya, A. D.,  
790 Adkins, J. N., Schramm, G., Purvine, S. O., Lopez-Ferrer, D., Weitz, K. K., Eils, R.,  
791 König, R., Smith, R. D., & Palsson, B. (2010). Omic data from evolved E. coli are  
792 consistent with computed optimal growth from genome-scale models. *Molecular*  
793 *Systems Biology*, 6(390). <https://doi.org/10.1038/msb.2010.47>
- 794 Liew, F. E., Nogle, R., Abdalla, T., Rasor, B. J., Canter, C., Jensen, R. O., Wang, L.,  
795 Strutz, J., Chirania, P., De Tissera, S., Mueller, A. P., Ruan, Z., Gao, A., Tran, L.,  
796 Engle, N. L., Bromley, J. C., Daniell, J., Conrado, R., Tschaplinski, T. J., ... Köpke,  
797 M. (2022). Carbon-negative production of acetone and isopropanol by gas  
798 fermentation at industrial pilot scale. *Nature Biotechnology*, 40(3), 335–344.  
799 <https://doi.org/10.1038/s41587-021-01195-w>
- 800 Mahadevan, R., Edwards, J. S., & Doyle, F. J. (2002). Dynamic flux balance analysis of  
801 diauxic growth. *Biophysical Journal*, 83(3), 1331–1340.  
802 [https://pdfs.semanticscholar.org/8d56/a26c56704266b5d7c426ecdfc286962f9112.p](https://pdfs.semanticscholar.org/8d56/a26c56704266b5d7c426ecdfc286962f9112.pdf)  
803 [df](https://pdfs.semanticscholar.org/8d56/a26c56704266b5d7c426ecdfc286962f9112.pdf)
- 804 Mendoza, S. N., Olivier, B. G., Molenaar, D., & Teusink, B. (2019). A systematic  
805 assessment of current genome-scale metabolic reconstruction tools. *Genome*  
806 *Biology*, 20(158). <https://doi.org/10.1186/s13059-019-1769-1>
- 807 Miguez, A. M., McNerney, M. P., & Styczynski, M. P. (2019). Metabolic Profiling of  
808 Escherichia coli-Based Cell-Free Expression Systems for Process Optimization.

- 809 *Industrial and Engineering Chemistry Research*, 58(50), 22472–22482.  
810 <https://doi.org/10.1021/acs.iecr.9b03565>
- 811 Miguez, A. M., Zhang, Y., Piorino, F., & Styczynski, M. P. (2021). Metabolic Dynamics in  
812 *Escherichia coli*-Based Cell-Free Systems. *ACS Synthetic Biology*.  
813 <https://doi.org/10.1021/acssynbio.1c00167>
- 814 Min Lee, J., Gianchandani, E. P., Eddy, J. A., & Papin, J. A. (2008). Dynamic analysis of  
815 integrated signaling, metabolic, and regulatory networks. *PLoS Computational*  
816 *Biology*, 4(5). <https://doi.org/10.1371/journal.pcbi.1000086>
- 817 Naseri, G., & Koffas, M. A. G. (2020). Application of combinatorial optimization strategies  
818 in synthetic biology. *Nature Communications*, 11(1), 1–14.  
819 <https://doi.org/10.1038/s41467-020-16175-y>
- 820 Norsigian, C. J., Pusarla, N., McConn, J. L., Yurkovich, J. T., Dräger, A., Palsson, B. O.,  
821 & King, Z. (2020). BiGG Models 2020: Multi-strain genome-scale models and  
822 expansion across the phylogenetic tree. *Nucleic Acids Research*, 48(D1), D402–  
823 D406. <https://doi.org/10.1093/nar/gkz1054>
- 824 Orth, J. D., Palsson, B. Ø., & Fleming, R. M. T. (2010). Reconstruction and Use of  
825 Microbial Metabolic Networks: the Core *Escherichia coli* Metabolic Model as an  
826 Educational Guide. *EcoSal Plus*, 4(1). <https://doi.org/10.1128/ecosalplus.10.2.1>
- 827 Orth, J. D., Thiele, I., & Palsson, B. O. (2010). What is flux balance analysis? *Nature*  
828 *Biotechnology*, 28(3), 245–248. <https://doi.org/10.1038/nbt.1614>
- 829 Rasor, B. J., Vögeli, B., Jewett, M. C., & Karim, A. S. (2022). Cell-Free Protein Synthesis  
830 for High-Throughput Biosynthetic PathwayBiosynthetic pathways Prototyping. In A.  
831 S. Karim & M. C. Jewett (Eds.), *Cell-Free Gene Expression: Methods and Protocols*  
832 (pp. 199–215). Springer US. [https://doi.org/10.1007/978-1-0716-1998-8\\_12](https://doi.org/10.1007/978-1-0716-1998-8_12)
- 833 Rasor, B. J., Vögeli, B., Landwehr, G. M., Bogart, J. W., Karim, A. S., & Jewett, M. C.  
834 (2021). Toward sustainable, cell-free biomanufacturing. *Current Opinion in*

- 835 *Biotechnology*, 69, 136–144. <https://doi.org/10.1016/j.copbio.2020.12.012>
- 836 Ro, D. K., Paradise, E. M., Quellet, M., Fisher, K. J., Newman, K. L., Ndungu, J. M., Ho,  
837 K. A., Eachus, R. A., Ham, T. S., Kirby, J., Chang, M. C. Y., Withers, S. T., Shiba,  
838 Y., Sarpong, R., & Keasling, J. D. (2006). Production of the antimalarial drug  
839 precursor artemisinic acid in engineered yeast. *Nature*, 440(7086), 940–943.  
840 <https://doi.org/10.1038/nature04640>
- 841 Saa, P. A., & Nielsen, L. K. (2016). Construction of feasible and accurate kinetic models  
842 of metabolism: A Bayesian approach. *Scientific Reports*, 6.  
843 <https://doi.org/10.1038/srep29635>
- 844 Saa, P. A., & Nielsen, L. K. (2017). Formulation, construction and analysis of kinetic  
845 models of metabolism: A review of modelling frameworks. *Biotechnology Advances*,  
846 35(8), 981–1003. <https://doi.org/10.1016/j.biotechadv.2017.09.005>
- 847 Sánchez, B. J., Zhang, C., Nilsson, A., Lahtvee, P.-J., Kerkhoven, E. J., & Nielsen, J.  
848 (2017). Improving the phenotype predictions of a yeast genome-scale metabolic  
849 model by incorporating enzymatic constraints. *Molecular Systems Biology*, 13(8),  
850 935. <https://doi.org/10.15252/msb.20167411>
- 851 Shestov, A. A., Liu, X., Ser, Z., Cluntun, A. A., Hung, Y. P., Huang, L., Kim, D., Le, A.,  
852 Yellen, G., Albeck, J. G., & Locasale, J. W. (2014). Quantitative determinants of  
853 aerobic glycolysis identify flux through the enzyme GAPDH as a limiting step. *ELife*,  
854 3(July2014), 1–18. <https://doi.org/10.7554/eLife.03342>
- 855 Silverman, A. D., Karim, A. S., & Jewett, M. C. (2020). Cell-free gene expression: an  
856 expanded repertoire of applications. *Nature Reviews Genetics*, 21(3), 151–170.  
857 <https://doi.org/10.1038/s41576-019-0186-3>
- 858 Solem, C., Koebmann, B. J., & Jensen, P. R. (2003). Glyceraldehyde-3-phosphate  
859 dehydrogenase has no control over glycolytic flux in *Lactococcus lactis* MG1363.  
860 *Journal of Bacteriology*, 185(5), 1564–1571. <https://doi.org/10.1128/JB.185.5.1564->

861 1571.2003

862 St John, P. C., Strutz, J., Broadbelt, L. J., Tyo, K. E. J., & Bomble, Y. J. (2019). Bayesian  
863 inference of metabolic kinetics from genome-scale multiomics data. *PLoS*  
864 *Computational Biology*, 15(11), 1–23. <https://doi.org/10.1371/journal.pcbi.1007424>

865 Strutz, J., Martin, J., Greene, J., Broadbelt, L., & Tyo, K. (2019). Metabolic kinetic  
866 modeling provides insight into complex biological questions, but hurdles remain.  
867 *Current Opinion in Biotechnology*, 59. <https://doi.org/10.1016/j.copbio.2019.02.005>

868 Suthers, P. F., Foster, C. J., Sarkar, D., Wang, L., & Maranas, C. D. (2021). Recent  
869 advances in constraint and machine learning-based metabolic modeling by  
870 leveraging stoichiometric balances, thermodynamic feasibility and kinetic law  
871 formalisms. *Metabolic Engineering*, 63(August 2020), 13–33.  
872 <https://doi.org/10.1016/j.ymben.2020.11.013>

873 Tan, Y., Lafontaine Rivera, J. G., Contador, C. A., Asenjo, J. A., & Liao, J. C. (2011).  
874 Reducing the allowable kinetic space by constructing ensemble of dynamic models  
875 with the same steady-state flux. *Metabolic Engineering*, 13(1), 60–75.  
876 <https://doi.org/10.1016/j.ymben.2010.11.001>

877 Tran, L. M., Rizk, M. L., & Liao, J. C. (2008). Ensemble modeling of metabolic networks.  
878 *Biophysical Journal*, 95(12), 5606–5617.  
879 <https://doi.org/10.1529/biophysj.108.135442>

880 Tsiantis, N., & Banga, J. R. (2020). Using optimal control to understand complex  
881 metabolic pathways. *BMC Bioinformatics*, 21(472). [https://doi.org/10.1186/s12859-](https://doi.org/10.1186/s12859-020-03808-8)  
882 [020-03808-8](https://doi.org/10.1186/s12859-020-03808-8)

883 van Eunen, K., Kiewiet, J. A. L., Westerhoff, H. V., & Bakker, B. M. (2012). Testing  
884 biochemistry revisited: How in vivo metabolism can be understood from in vitro  
885 enzyme kinetics. *PLoS Computational Biology*, 8(4).  
886 <https://doi.org/10.1371/journal.pcbi.1002483>

887 van Rosmalen, R. P., Smith, R. W., Martins dos Santos, V. A. P., Fleck, C., & Suarez-  
888 Diez, M. (2021). Model reduction of genome-scale metabolic models as a basis for  
889 targeted kinetic models. *Metabolic Engineering*, 64(January), 74–84.  
890 <https://doi.org/10.1016/j.ymben.2021.01.008>

891 Villaverde, A., Tsiantis, N., & Banga, J. (2019). Full observability and estimation of  
892 unknown inputs, states, and parameters of nonlinear biological models. *J. R. Soc.*  
893 *Interface*.

894 Vogeli, B., Schulz, L., Garg, S., Tarasava, K., Clomburg, J. M., Lee, H., Gonnot, A.,  
895 Mouilly, E. H., Kimmel, B. R., Tran, L., Brown, S. D., Mrksich, M., Karim, A. S., &  
896 Jewett, M. C. (2022). *Cell-free prototyping enables implementation of optimized*  
897 *reverse  $\beta$ -oxidation pathways in heterotrophic and autotrophic bacteria.*

898 Wu, G., Yan, Q., Jones, J. A., Tang, Y. J., Fong, S. S., & Koffas, M. A. G. (2016).  
899 Metabolic Burden: Cornerstones in Synthetic Biology and Metabolic Engineering  
900 Applications. *Trends in Biotechnology*, 34(8), 652–664.  
901 <https://doi.org/10.1016/j.tibtech.2016.02.010>

902

903



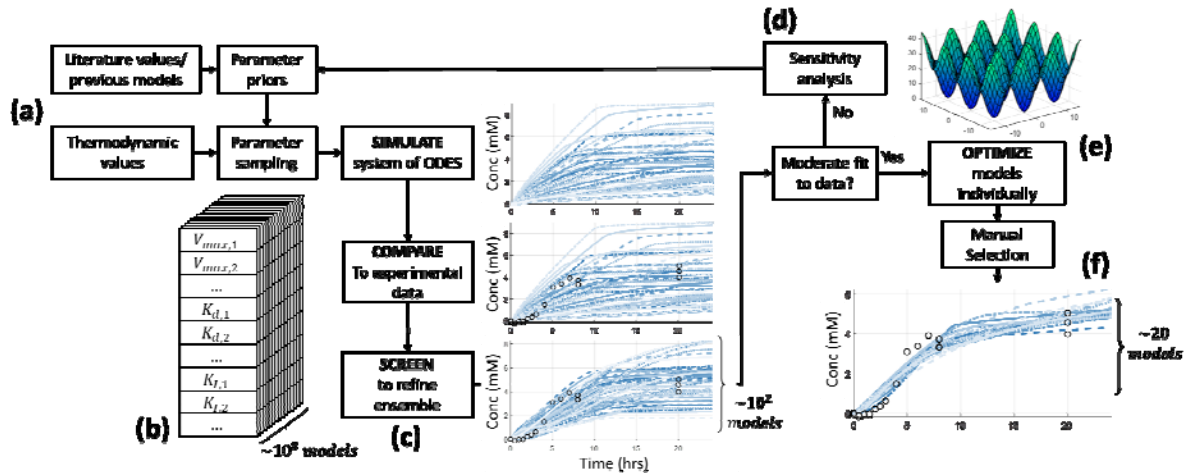

912

913 **Figure 2: Model parameterization pipeline.** (a) Parameter priors are initially  
 914 constructed from literature values and similar previous models. (b) Individual models, or  
 915 parameter sets, are sampled from parameter priors while simultaneously applying  
 916 thermodynamic values as constraints. This is repeated to create ensembles of  $10^8$   
 917 models. (c) The initial ensemble is simulated via ODEs and then compared to  
 918 experimental data; the ensemble is then screened to the best  $\sim 10^2$  models based on  
 919 agreement to this data. (d) When the agreement to experimental data after screening  
 920 was still insufficient, parameter sensitivity analysis was performed and used to update  
 921 parameter priors for additional rounds of ensemble sampling and screening. (e) Once  
 922 screened models showed adequate agreement to experimental data, each individual  
 923 model was further refined via local parameter optimization. (f) This full pipeline  
 924 generated an ensemble of 20 models which gave excellent fit to the experimental data  
 925 and were further used for analysis and predictions.



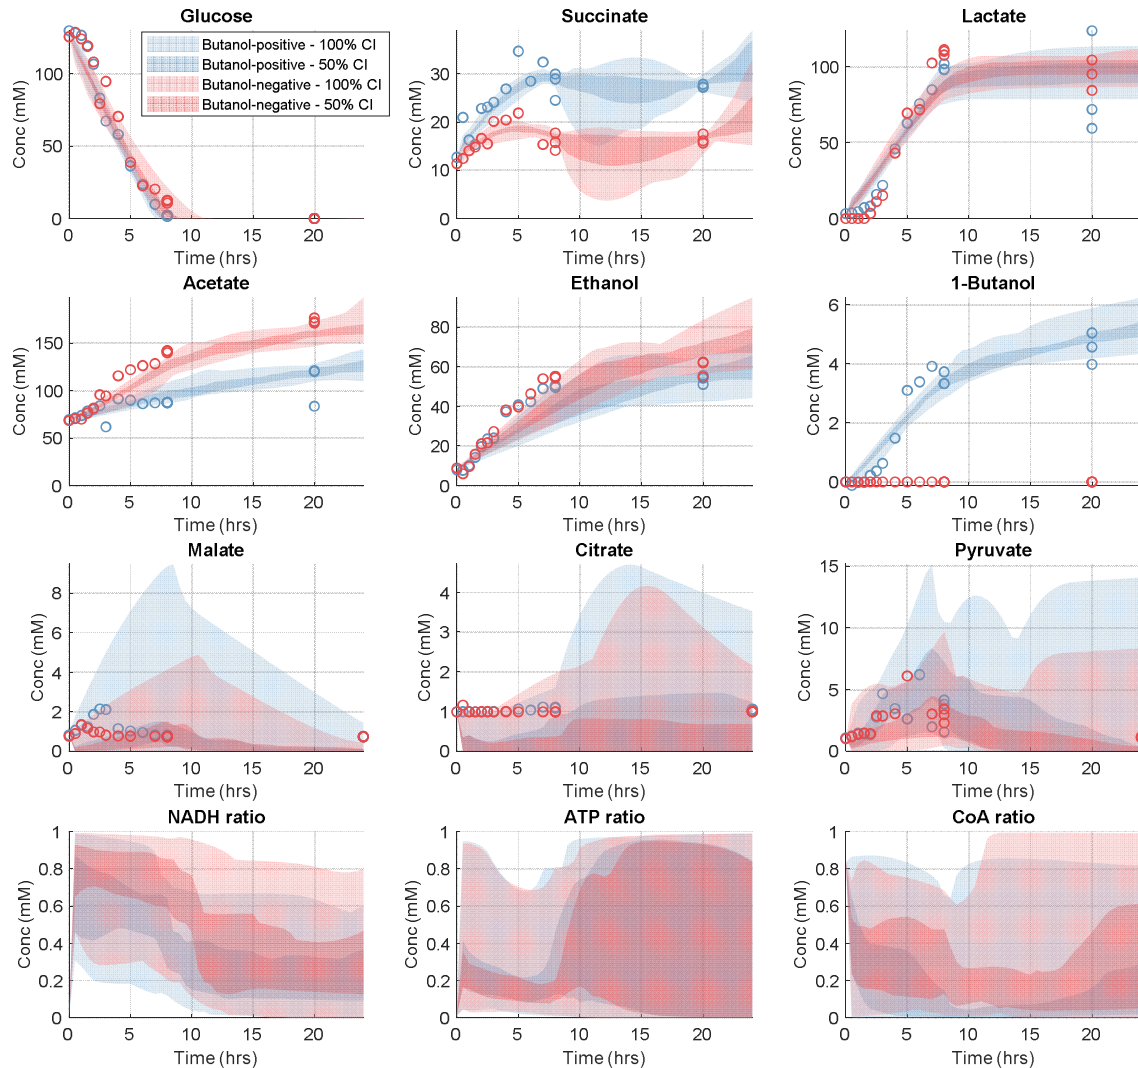

926  
927

**Figure 3: Final ensemble simulations compared to experimental data.** Model

928 simulated metabolite time courses are shown for the nine metabolites with experimental  
929 measurements, as well as predicted time courses for the ratios of NADH to all NAD  
930 species, ATP to all adenosine species, and free CoA to all CoA species. Experimental  
931 measurements are shown as circles. The simulations of the top 20 models in the  
932 ensemble are shown as confidence intervals (CI); the dark region is a 50% CI and  
933 therefore contains the middle 50% of models, and the lighter region is a 95% CI. Blue  
934 data represent the butanol-positive condition, and red data represent the butanol-  
935 negative condition.



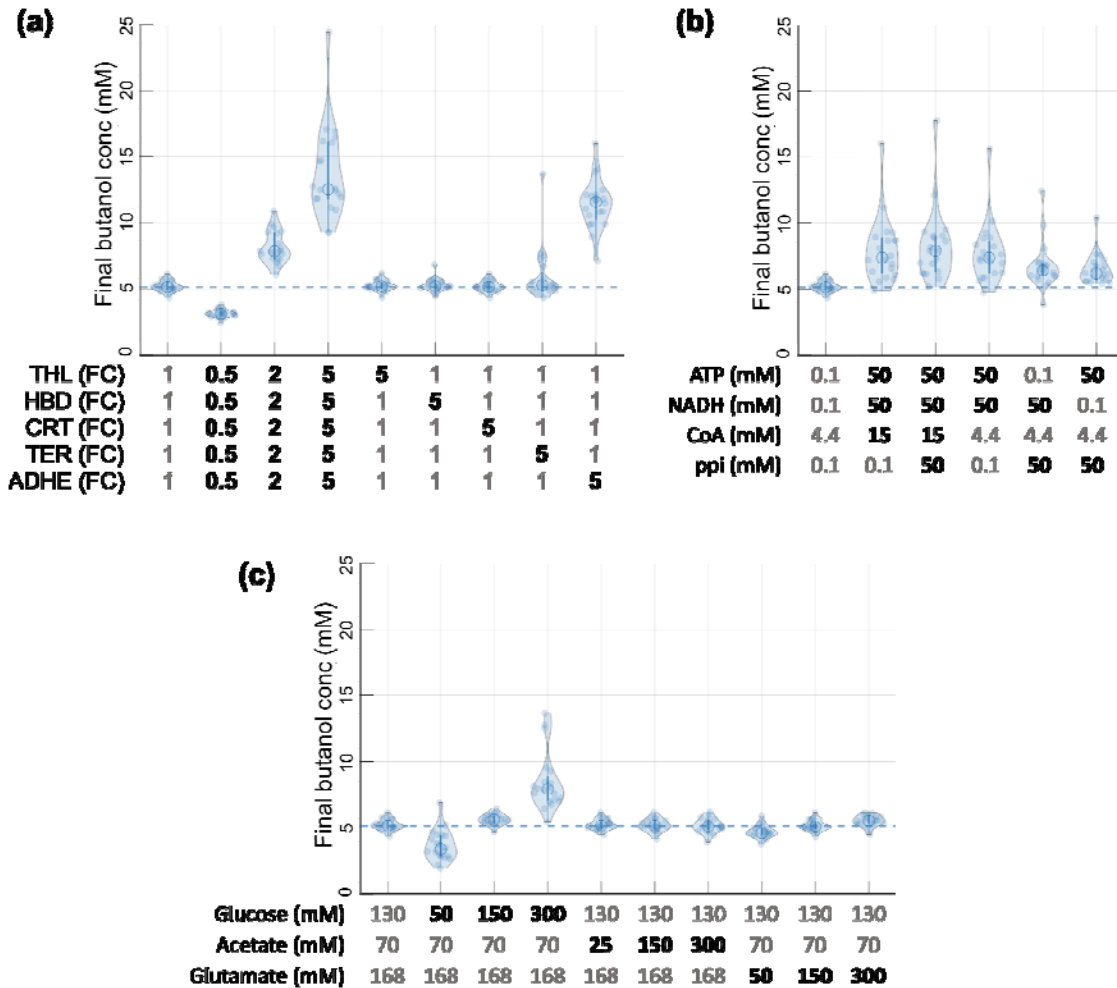

936

937 **Figure 4: Predictions for butanol optimization.** (a) Enzyme level changes were  
 938 simulated to optimize 24-hour butanol titer. The left-most column shows the simulated  
 939 butanol at 24 hours in the base butanol-positive condition, which was fit to experimental  
 940 data. Each light blue dot represents one of the 20 models in the final ensemble, and their  
 941 distribution is summarized by each violin plot with medians given by unfilled dark blue  
 942 circles and interquartile ranges given by dark blue lines. The horizontal dashed line  
 943 shows the base condition median prediction as a baseline. The next three columns show  
 944 the predicted butanol titer from simultaneously adjusting all five enzymes in the butanol  
 945 pathway by either 0.5x, 2x, or 5x their respective levels in the base production condition.  
 946 The next five columns show the predicted butanol titer from adjusting each of the five

947 enzymes one at a time by 5x their respective levels in the base production condition. (b)  
948 Initial cofactor level changes were simulated to optimize 24-hour butanol titer. The left-  
949 most column shows the simulated butanol at 24 hours in the base butanol-positive  
950 condition and the base cofactor concentrations in gray. The next five columns show the  
951 predicted butanol titer from raising the concentrations of the cofactors predicted to  
952 improve butanol titers, which included NADH, ATP, CoA, and pyrophosphate (ppi), either  
953 individually or in groups. (c) Predicted butanol titers from adjusting the initial  
954 concentrations of either glucose, acetate, or glutamate are shown. Initial concentrations  
955 of each species in the base condition (left-most column) are shown in gray.

956

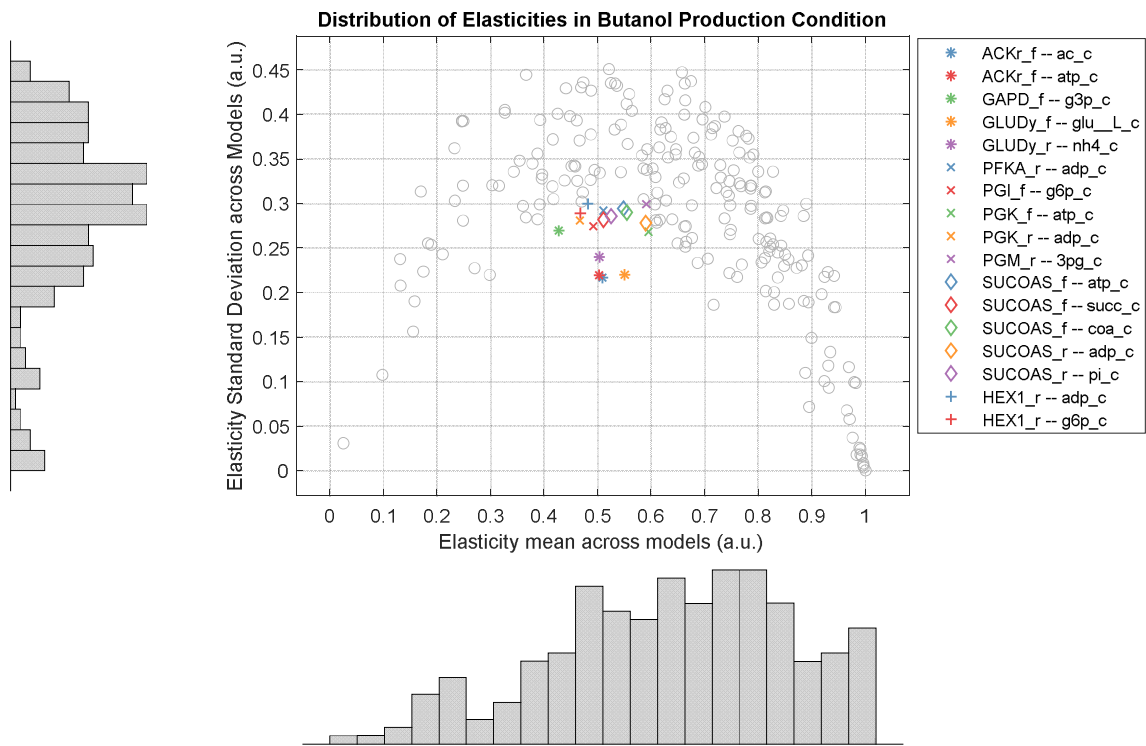

957

958 **Figure 5: Analysis of parameter variation across models shows small**

959 **number of highly conserved parameters.** Elasticity values for each parameter, which

960 serve as a more informative proxy for absolute parameter values, are plotted with their

961 mean value across the top 20 models in the final ensemble (x axis) versus the standard

962 deviation across the top 20 models (y axis). Each point represents a single elasticity or

963 model parameter, and marginal histograms for both mean and standard deviation show

964 distributions across these elasticities. Elasticity values near 0 represent elasticities for

965 metabolites that are fully saturated (zeroth order kinetics), and values near 1 represent

966 metabolites far below saturation in a linear regime (first order kinetics). Those

967 parameters which a mean elasticity between 0.4 and 0.6, representing a high degree of

968 control over the reaction rate, and a standard deviation below 0.3, representing highly

969 conserved behavior among all models in the ensemble, are highlighted with names

970 given in the legend, denoted by the reaction name (i.e., ACKr for acetate kinase), then  
971 the reaction direction (“\_f” for forward or “\_r” for reverse), then the reaction substrate  
972 (i.e., “ac\_c” for acetate). A complete list of reaction, substrate, and elasticity names is  
973 given. Elasticity values are calculated as the derivative of reaction rate with respect to  
974 metabolite concentration and are normalized with respect to both rate and concentration,  
975 as well as the stoichiometry of the metabolite in each reaction. To ensure all values were  
976 between 0 and 1, metabolites acting as inhibitors are not shown in this figure.  
977
